# Supplementary material for: Heterophilic and homophilic cadherin interactions in intestinal intermicrovillar links are species dependent
Source: PLOS journal article supplement (doi:10.1371/journal.pbio.3001463), 2021-12-06
Supplement: S11 (10.1371/journal.pbio.3001463.s011) [file journal.pbio.3001463.s011]

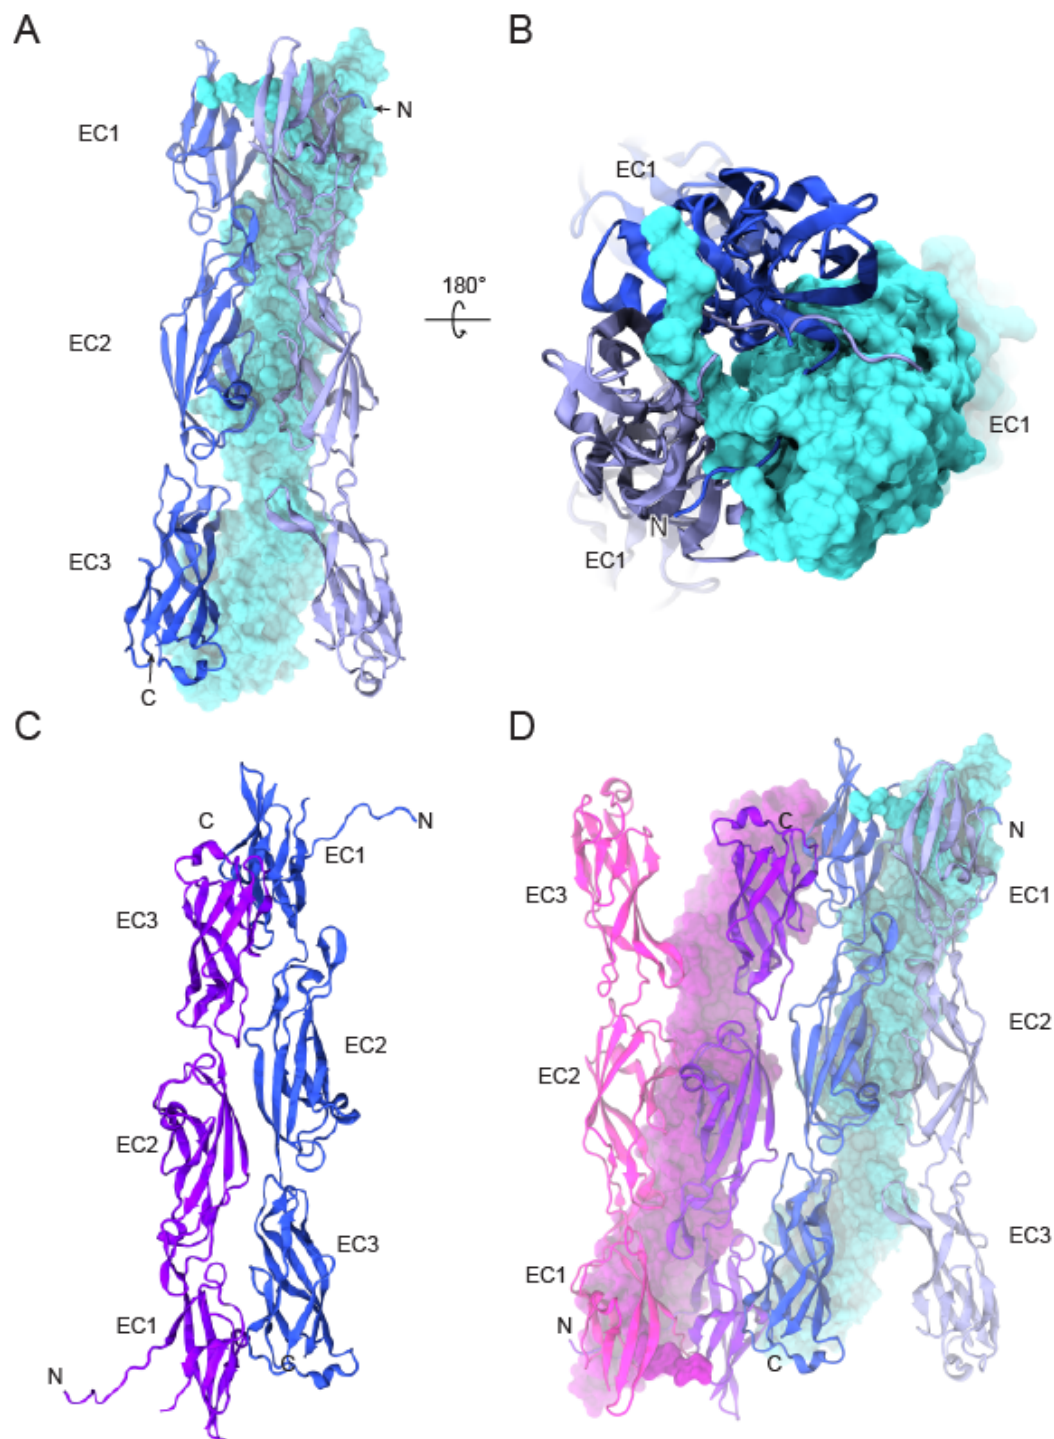

**S11 Fig. Crystal contacts in the *mm* PCDH24 EC1-3 structure.** (A) Crystal contacts show a potential *cis* trimer formed by three parallel monomers. The interface area between two monomers is 1352.6 Å<sup>2</sup>. Two monomers are shown as ribbons while the third one is shown in molecular surface representation. (B) Detail of trimer seen from EC1 (top) shows that the extended N-terminal strands interlace between monomers. (C) Crystal contacts show an antiparallel *trans* dimer with an interface area of 1221.2 Å<sup>2</sup>. (D) Taken together, the potential *cis* and *trans* interfaces form a large complex with two *cis* trimers forming an antiparallel *trans* dimer.
