# Supplementary material for: Heterophilic and homophilic cadherin interactions in intestinal intermicrovillar links are species dependent
Source: PLOS journal article supplement (doi:10.1371/journal.pbio.3001463), 2021-12-06
Supplement: S19 (10.1371/journal.pbio.3001463.s019) [file journal.pbio.3001463.s019]

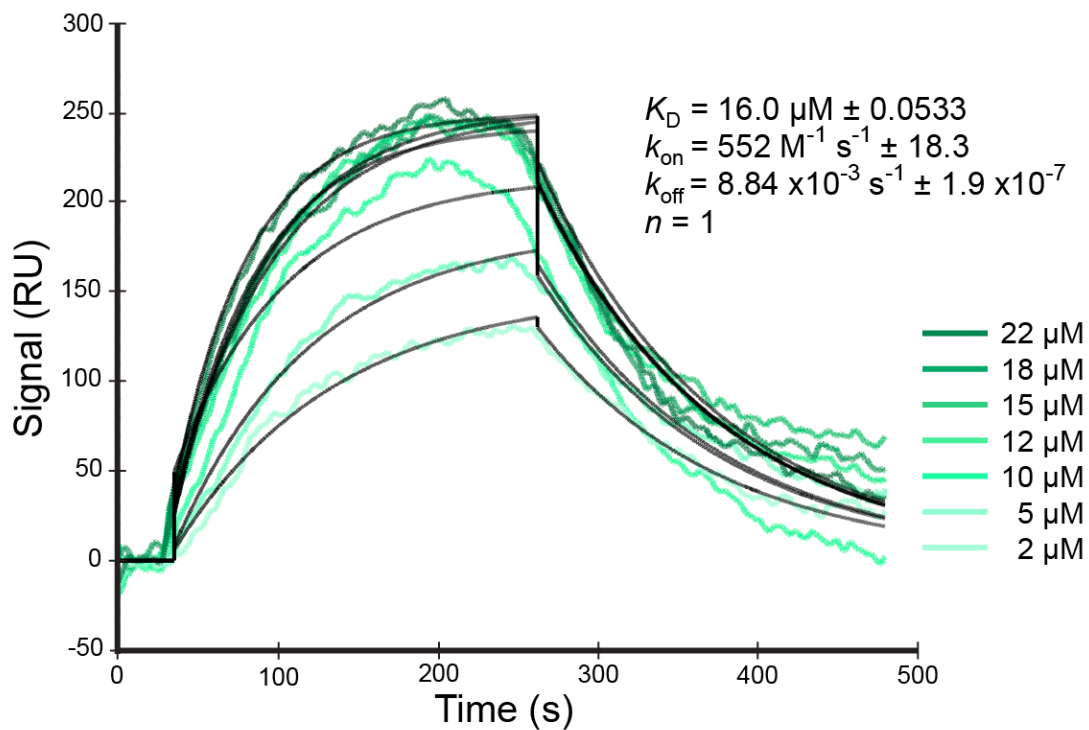

**S19 Fig. Surface plasmon resonance (SPR) experiments testing the minimal adhesive unit for mouse PCDH24 and CDHR5.** Raw data from the SPR experiment performed on *mm* PCDH24 EC1-2Fc and *mm* CDHR5 EC1-2 shown in green gradient from lowest concentration (light green) to highest concentration (dark green) of *mm* CDHR5 EC1-2, with fits in black. The average affinity  $K_D$  and rates ( $k_{\text{on}}$  and  $k_{\text{off}}$ ) are indicated ( $n = 1$ ). Values were obtained from a kinetic analysis of the raw data (S13 Data).
